# Supplementary material for: The inert pair effect on heavy noble gases: insights from radon tetroxide
Source: Royal Society of Chemistry journal article supplement (doi:10.1039/d3cp01347b), 2023-01-01
Supplement: d3cp01347b1.pdf [file d3cp01347b1.pdf]

## Supporting Information

# The inert pair effect on the heavy noble gases: New insights from radon tetroxide.

Nuno A. G. Bandeira\*<sup>1</sup>, Joaquim Marçalo<sup>2</sup>

<sup>1</sup> BioISI, Faculdade de Ciências, Universidade de Lisboa, Campo Grande, 1749-016 Lisboa, Portugal.

<sup>2</sup> Centro de Química Estrutural, Institute of Molecular Sciences, Instituto Superior Técnico, Universidade de Lisboa, Estrada Nacional 10, 2695-066 Bobadela LRS, Portugal.

\*Email: [nuno.bandeira@ciencias.ulisboa.pt](mailto:nuno.bandeira@ciencias.ulisboa.pt)

## Contents

|                                                                                                                |   |
|----------------------------------------------------------------------------------------------------------------|---|
| Supporting Information The inert pair effect on the heavy noble gases: New insights from radon tetroxide. .... | 1 |
| 1. Radial structures of relativistic and non-relativistic atoms at the Hartree-Fock level                      | 2 |
| 2. Structure and Bonding of NgO <sub>4</sub> . ....                                                            | 2 |
| 3. Structure and Bonding of Ng(η <sup>2</sup> -O <sub>2</sub> ) <sub>2</sub> . ....                            | 3 |
| 4. Structure and Bonding in NgO <sub>2</sub> (η <sup>2</sup> -O <sub>2</sub> ). ....                           | 6 |

## 1. Radial structures of relativistic and non-relativistic atoms at the Hartree-Fock level

Table S 1 – Radial expectation values of Ng atoms and Ng<sup>8+</sup> ions, with and without relativity.

| HF/x2c-TZVPP              | $\langle r_{ns} \rangle / \text{a.u.}$ | $\Delta \langle r_{ns} \rangle / \text{a.u.}$ | $\langle r_{np} \rangle / \text{a.u.}$ | $\Delta \langle r_{np} \rangle / \text{a.u.}$ |
|---------------------------|----------------------------------------|-----------------------------------------------|----------------------------------------|-----------------------------------------------|
| <b>Xe</b>                 | 1.903                                  |                                               | 2.320                                  |                                               |
| <b>nr-Xe</b>              | 2.014                                  | -0.111                                        | 2.345                                  | -0.025                                        |
| <b>Xe<sup>8+</sup></b>    | 1.645                                  |                                               | 1.822                                  |                                               |
| <b>nr-Xe<sup>8+</sup></b> | 1.705                                  | -0.060                                        | 1.852                                  | -0.030                                        |
| <b>Rn</b>                 | 1.923                                  |                                               | 2.463                                  |                                               |
| <b>nr-Rn</b>              | 2.291                                  | -0.368                                        | 2.654                                  | -0.191                                        |
| <b>Rn<sup>8+</sup></b>    | 1.679                                  |                                               | 1.948                                  |                                               |
| <b>nr-Rn<sup>8+</sup></b> | 1.966                                  | -0.287                                        | 2.167                                  | -0.219                                        |

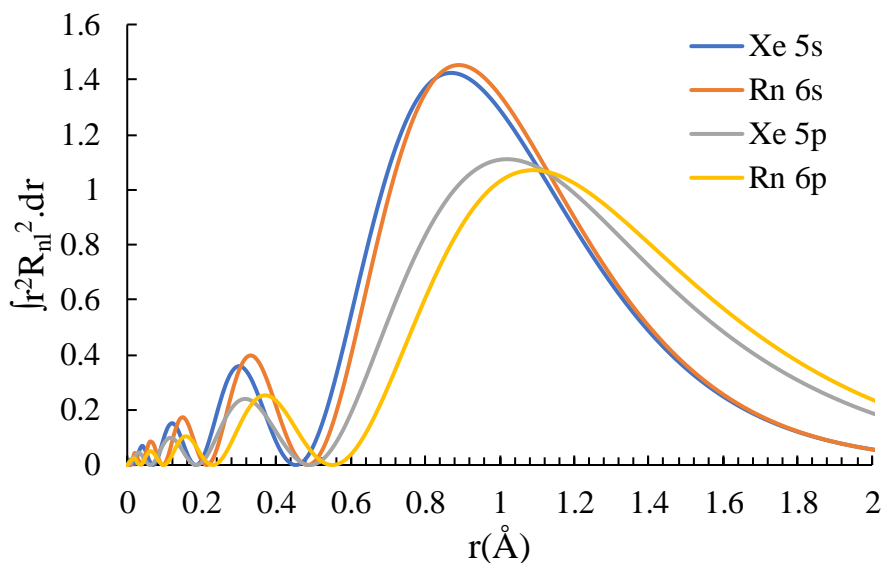

Figure S 1 – Electronic radial distribution densities of the s and p shells of Xe and Rn atoms at the HF/def2-TZVPP level.

## 2. Structure and Bonding of NgO<sub>4</sub>.

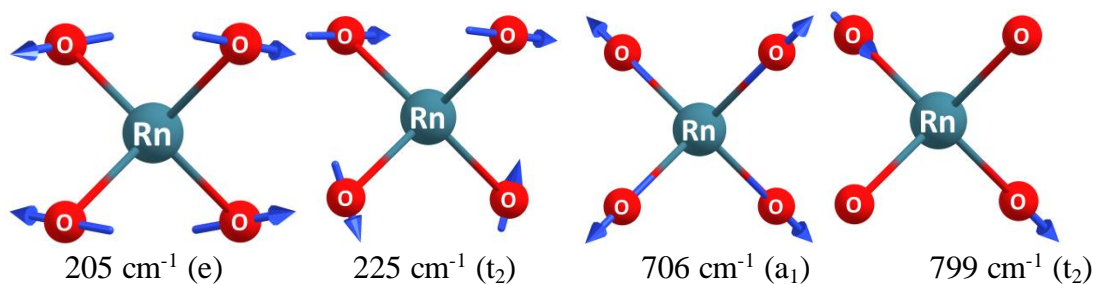

Figure S 2 – Vibrational modes of radon tetroxide calculated with CCSD(T)/DKH-TZVPP. Blue arrows show the atomic displacements.

### 3. Structure and Bonding of Ng( $\eta^2$ -O<sub>2</sub>)<sub>2</sub>.

A CASPT2(22,15) optimisation was performed explicitly correlating all the p orbitals in Ng and O. The result was the maintaining of D<sub>2h</sub> symmetry with a O-O bond length of 1.447 Å (Figure S 3).

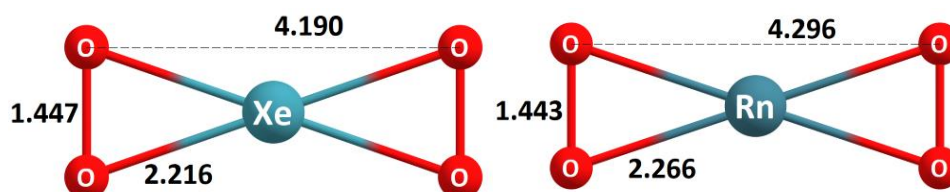

Figure S 3– Optimised CASPT2(22,15) molecular structure of Ng( $\eta^2$ -O<sub>2</sub>)<sub>2</sub> (Ng=Xe,Rn) with selected bond distances (Å).

The ground state electronic structure is constituted of a two configurational wavefunction by the interaction of a set of  $\pi^*$  orbitals from the di-oxo ligands (Figure S 4). The leading configuration is 61.3% of the total wavefunction and the remainder 16.7% corresponds to the doubly occupied in phase  $\pi^*$  fragment MOs (Figure S 4 and Table S 2).

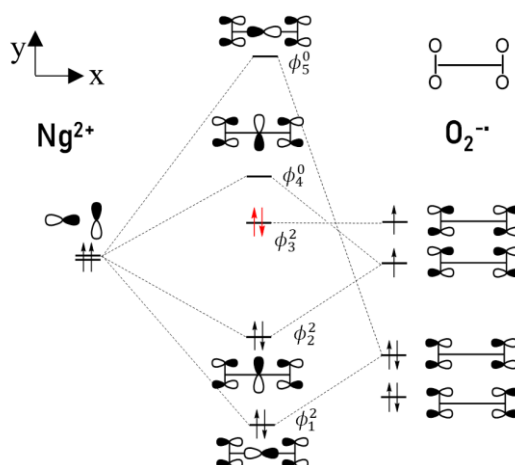

Figure S 4 – Principal orbital interactions and dominant electron configuration in Ng( $\eta^2$ -O<sub>2</sub>)<sub>2</sub> species. The remaining valence orbitals that are not shown are all doubly occupied.

Table S 2 – Squared amplitudes ( $\times 100$ ) of each CASSCF(22,15) configuration state function.

| CSF                                                    | Xe( $\eta^2$ -O <sub>2</sub> ) <sub>2</sub> | Rn( $\eta^2$ -O <sub>2</sub> ) <sub>2</sub> |
|--------------------------------------------------------|---------------------------------------------|---------------------------------------------|
| $ \phi_1^2 \phi_2^2 \phi_3^2 \phi_4^0 \phi_5^0\rangle$ | 61.3                                        | 60.9                                        |
| $ \phi_1^2 \phi_2^2 \phi_3^0 \phi_4^2 \phi_5^0\rangle$ | 16.7                                        | 19.5                                        |

Furthermore, this configurational admixing may be quantified via the non-adiabatic coupling matrix elements obtained from the effective Hamiltonian pursuant to

a Mk(2,2)-CCSD(T)/x2c-TZVPP//CASPT2(22,15)/x2c-TZVPP calculation. The main parameters are summarised in Table S 3.

Table S 3 – Properties of the two configurational mixing of the ground state of Ng( $\eta^2$ -O<sub>2</sub>)<sub>2</sub> species.

| Mk(2,2)-CCSD(T)                                           | Adiabatic GS<br>C <sub>μ</sub><br>Xe( $\eta^2$ -O <sub>2</sub> ) <sub>2</sub> | $\Delta E_{\text{adiab}}$ (a.u.)<br>Xe( $\eta^2$ -O <sub>2</sub> ) <sub>2</sub> | $\Delta E_{\text{diab}}$ (a.u.)<br>Xe( $\eta^2$ -O <sub>2</sub> ) <sub>2</sub> | Adiabatic GS<br>C <sub>μ</sub><br>Rn( $\eta^2$ -O <sub>2</sub> ) <sub>2</sub> | $\Delta E_{\text{adiab}}$ (a.u.)<br>Rn( $\eta^2$ -O <sub>2</sub> ) <sub>2</sub> | $\Delta E_{\text{diab}}$ (a.u.)<br>Rn( $\eta^2$ -O <sub>2</sub> ) <sub>2</sub> |
|-----------------------------------------------------------|-------------------------------------------------------------------------------|---------------------------------------------------------------------------------|--------------------------------------------------------------------------------|-------------------------------------------------------------------------------|---------------------------------------------------------------------------------|--------------------------------------------------------------------------------|
| 1: $ \phi_1^2 \phi_2^2 \phi_3^2 \phi_4^0 \phi_5^0\rangle$ | -0.890                                                                        | 0                                                                               | 0                                                                              | -0.886                                                                        | 0                                                                               | 0                                                                              |
| 2: $ \phi_1^2 \phi_2^2 \phi_3^0 \phi_4^2 \phi_5^0\rangle$ | 0.456                                                                         | +0.2812                                                                         | +0.1587                                                                        | 0.464                                                                         | +0.2748                                                                         | +0.1480                                                                        |
| <b>H<sub>12</sub> (a.u.)</b>                              |                                                                               |                                                                                 | +0.1128                                                                        |                                                                               |                                                                                 | +0.1121                                                                        |
| <b>H<sub>21</sub> (a.u.)</b>                              |                                                                               |                                                                                 | +0.1194                                                                        |                                                                               |                                                                                 | +0.1196                                                                        |

The p<sub>z</sub> orbital sets in the O<sub>2</sub><sup>-</sup> fragment are all doubly occupied and so do not count to the overall bond making process as their bonding and antibonding counterparts are completely filled. The CASPT2 natural orbital occupations (Figure S4 and Table S 4) allow for the extraction of bond parameters such as the Effective Bond Order.<sup>1</sup>

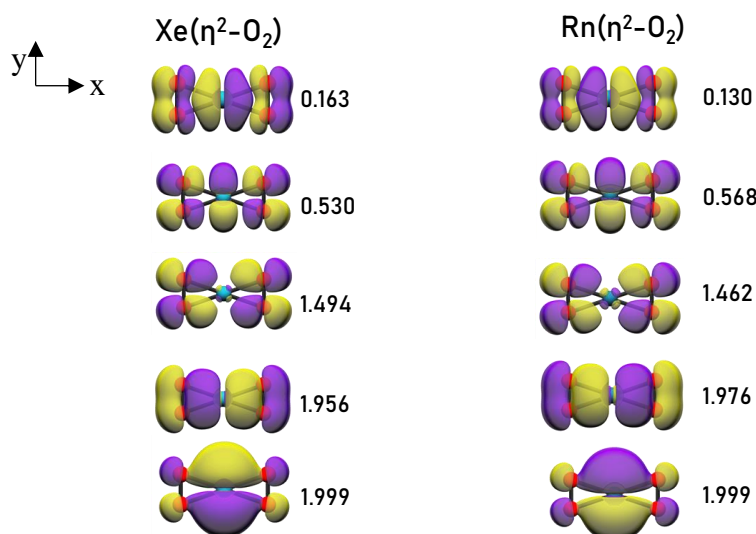

Figure S 5 – CASPT2(22,15) Natural Orbital Occupancies for the most important frontier orbitals (as shown in Figure S 4) in Ng( $\eta^2$ -O<sub>2</sub>)<sub>2</sub>.

In addition, the CASPT2 natural orbitals may undergo localisation by feeding the Pt2Orb file into the &LOCALISATION module to extract individual atomic occupations from the localised natural orbitals (LNO). It may be seen that both Xe( $\eta^2$ -O<sub>2</sub>)<sub>2</sub> and Rn( $\eta^2$ -O<sub>2</sub>)<sub>2</sub> have very similar bonding features.

Table S 4 – Essential localised natural occupancies obtained from CASPT2(22,15)/x2c-TZVPP level natural orbitals.

| CASPT2 LNO populations                    | Xe( $\eta^2$ -O <sub>2</sub> ) <sub>2</sub> | Rn( $\eta^2$ -O <sub>2</sub> ) <sub>2</sub> |
|-------------------------------------------|---------------------------------------------|---------------------------------------------|
| Ng p <sub>y</sub>                         | 1.82                                        | 1.82                                        |
| Ng p <sub>x</sub>                         | 1.01                                        | 0.916                                       |
| Ng p <sub>z</sub>                         | 1.97                                        | 1.97                                        |
| O <sub>2</sub> <sup>-</sup> ( $\pi_x^*$ ) | 1.09 (×2)                                   | 1.09 (×2)                                   |
| O <sub>2</sub> <sup>-</sup> ( $\pi_x$ )   | 1.47 (×2)                                   | 1.52 (×2)                                   |

|                              |                      |                      |
|------------------------------|----------------------|----------------------|
| $\text{O}_2^- (\pi_z^*)$     | 1.97 ( $\times 2$ )  | 1.97 ( $\times 2$ )  |
| $\text{O}_2^- (\pi_x)$       | 1.98 ( $\times 2$ )  | 1.98 ( $\times 2$ )  |
| $\text{O}_2^- (\sigma_y^*)$  | 0.084 ( $\times 2$ ) | 0.083 ( $\times 2$ ) |
| $\text{O}_2^- (\sigma_v)$    | 1.91 ( $\times 2$ )  | 1.91 ( $\times 2$ )  |
| <b>Effective Bond Orders</b> |                      |                      |
| <b>Ng-O</b>                  | 0.45                 | 0.42                 |
| <b>O-O</b>                   | 1.11                 | 1.13                 |

Analysis of the vibrational modes calculated numerically with CASPT2 confirms the stationary point as a local minimum (Figure S 6, Table S 5). The smallest vibrational displacement corresponds to an in-plane rotation of the superoxo- groups ( $36$  and  $13 \text{ cm}^{-1}$ ). The three vibrational modes revealing the Rn-OO bond strengths show up in the  $300 \text{ cm}^{-1}$  range. These are consistently more energetic than the corresponding Xe-OO vibrations by a few dozen  $\text{cm}^{-1}$ .

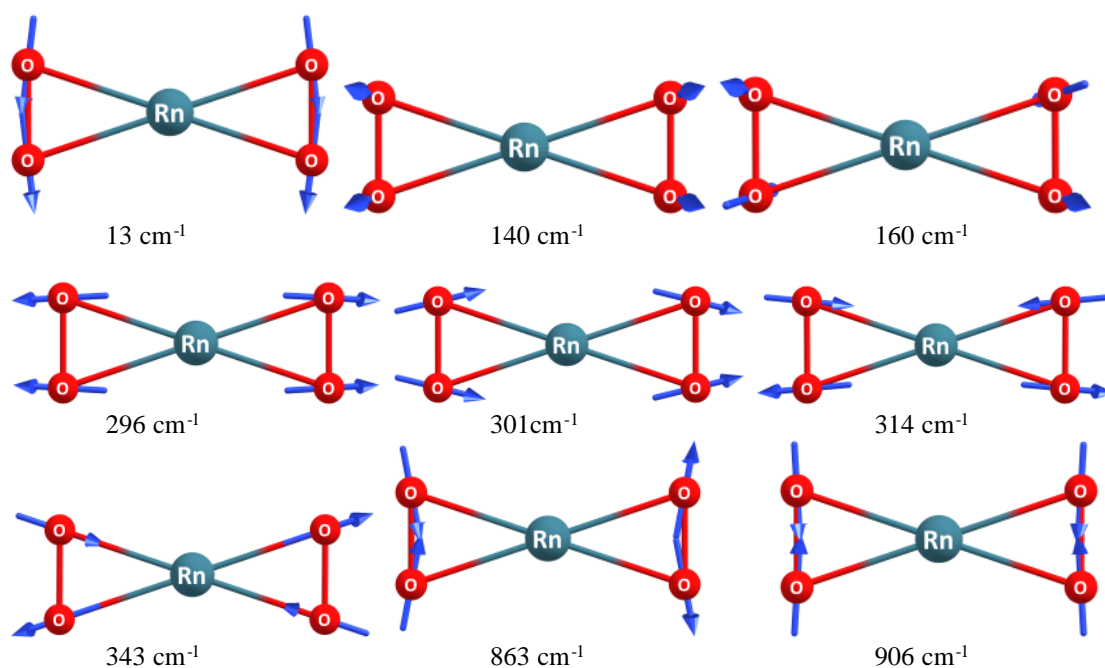

Figure S 6 – CASPT2(22,15) vibrational modes of  $\text{Rn}(\eta^2\text{-O}_2)_2$ . See Table S 5 for intensities.

Table S 5 – CASPT2(22,15)/x2c-TZVPP vibrational modes of  $\text{Ng}(\eta^2\text{-O}_2)$ .

| Modes | $\nu/\text{cm}^{-1}$ $\text{Xe}(\eta^2\text{-O}_2)_2$ | Int.                 | $\nu/\text{cm}^{-1}$ $\text{Rn}(\eta^2\text{-O}_2)_2$ | Int.                  |
|-------|-------------------------------------------------------|----------------------|-------------------------------------------------------|-----------------------|
| 1     | 36                                                    | 13.2                 | 13                                                    | 14.3                  |
| 2     | 171                                                   | 11.1                 | 140                                                   | 11.3                  |
| 3     | 196                                                   | 0.025                | 160                                                   | 4.94                  |
| 4     | 265                                                   | $6.2 \times 10^{-4}$ | 296                                                   | $2.61 \times 10^{-3}$ |

|   |     |                      |     |                       |
|---|-----|----------------------|-----|-----------------------|
| 5 | 283 | 45.1                 | 301 | 38.6                  |
| 6 | 295 | 0.019                | 314 | 6.02                  |
| 7 | 308 | 6.3                  | 343 | $1.69 \times 10^{-4}$ |
| 8 | 844 | 25.9                 | 863 | 37.7                  |
| 9 | 902 | $3.4 \times 10^{-3}$ | 906 | $3.6 \times 10^{-4}$  |

#### 4. Structure and Bonding in $\text{NgO}_2(\eta^2\text{-O}_2)$ .

The  $\text{NgO}_2(\eta^2\text{-O}_2)$  geometry (Figure S 7) was likewise optimised using the CCSD(T)/DKH-TZVPP protocol. The structure where the peroxide group is in the same plane as the two oxygen atoms is actually a transition state leading to the presently obtained local minimum. The structure with the peroxide group exactly perpendicular to the two oxygen atoms is not even a stationary point and will also lead to the presently obtained local minimum.

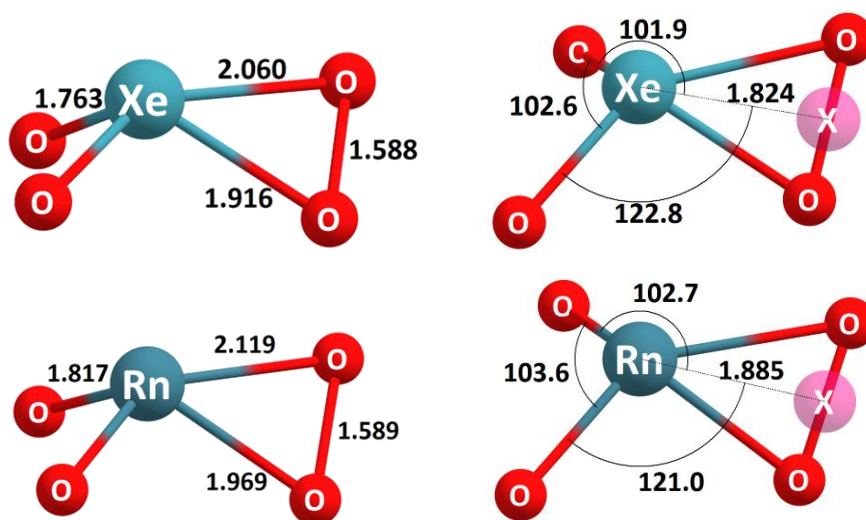

Figure S 7 – CCSD(T)/DKH-TZVPP optimised structures of  $\text{NgO}_2(\eta^2\text{-O}_2)$  with distances (left) in Å and angles (right) in degrees.

An NBO analysis was performed on the obtained minimum and a natural Lewis structure can be assigned with a conventional electron pair bond on  $\text{Ng-O}^1$  and a more charge polarised donating  $\text{Ng} \leftarrow \text{O}^2$  bond (Figure S 8). The Mayer-Mulliken bond orders (MBO) confirm the asymmetry of these bonds:  $\text{Xe-O}^1 = 0.913$ ,  $\text{Xe-O}^2 = 0.637$ ;  $\text{Rn-O}^1 = 0.718$ ,  $\text{Rn-O}^2 = 0.540$ .

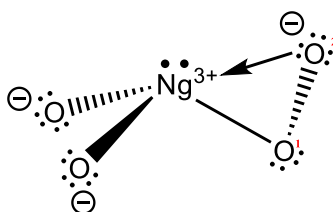

Figure S 8 – Natural Lewis structure of  $\text{NgO}_2(\eta^2\text{-O}_2)$  with formal charges.

Table S 6 – Natural Bond Orbital analysis of the  $\text{NgO}_2(\eta^2\text{-O}_2)$  species performed at the CCSD/DKH-TZVPP level.

| Natural Populations     | $\text{XeO}_2(\eta^2\text{-O}_2)$ | $\text{RnO}_2(\eta^2\text{-O}_2)$ |
|-------------------------|-----------------------------------|-----------------------------------|
| NAO Ng 5s/6s            | 1.707                             | 1.780                             |
| NAO Ng 5p/6p            | 3.328                             | 3.109                             |
| NLMO composition        |                                   |                                   |
| $\sigma(\text{Ng-O}^1)$ | 38.3% Xe + 61.7% O                | 36.0% Rn + 64.0% O                |
| $\sigma(\text{Ng-O}^2)$ | 14.1% Xe + 85.9% O                | 11.7% Rn + 88.3% O                |

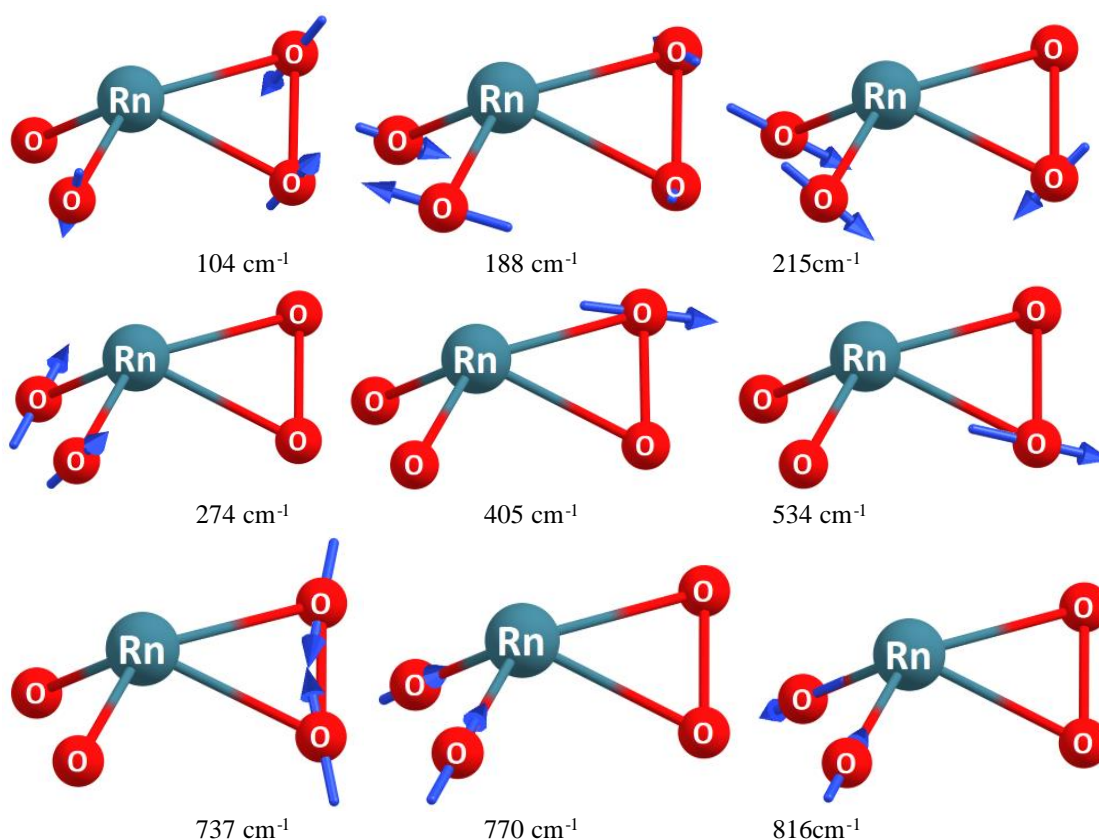

Figure S 9 - Vibrational modes of radon di-oxo peroxide calculated with CCSD(T)/DKH-TZVPP.

Table S 7 – Comparison between the vibrational modes of  $\text{NgO}_2(\eta^2\text{-O}_2)$  calculated at the CCSD(T)/DKH-TZVPP level.

| Modes | $\nu/\text{cm}^{-1}$ $\text{XeO}_2(\eta^2\text{-O}_2)$ | Int. | $\nu/\text{cm}^{-1}$ $\text{RnO}_2(\eta^2\text{-O}_2)$ | Int. |
|-------|--------------------------------------------------------|------|--------------------------------------------------------|------|
| 1     | 133                                                    | 2.48 | 104                                                    | 4.29 |
| 2     | 223                                                    | 11.8 | 188                                                    | 9.78 |
| 3     | 276                                                    | 18.7 | 215                                                    | 18.0 |
| 4     | 327                                                    | 13.3 | 274                                                    | 12.3 |
| 5     | 443                                                    | 66.3 | 405                                                    | 57.6 |

|          |     |      |     |      |
|----------|-----|------|-----|------|
| <b>6</b> | 565 | 27.2 | 534 | 22.4 |
| <b>7</b> | 750 | 2.54 | 737 | 2.63 |
| <b>8</b> | 823 | 60.2 | 770 | 51.2 |
| <b>9</b> | 864 | 79.0 | 816 | 67.2 |

1. Roos BO, Borin AC, Gagliardi L. Reaching the Maximum Multiplicity of the Covalent Chemical Bond. *Angew Chem Int Ed* 2007, **46**(9): 1469-1472.
